# Supplementary material for: Novel loss-of-function variants expand ABCC9-related intellectual disability and myopathy syndrome
Source: PubMed Central journal article supplement (PMC11068106; doi:10.1093/brain/awae010), 2024-01-13
Supplement: awae010_supplementary_data.pdf [file awae010_supplementary_data.pdf]

Supplementary Table 1: Clinical features of AIMS patients.

| Patient ID                                            | 1-1                                                          | 2-1                                                                           | 2-2                             | 3-1                                                                              | 4-1                           | 5-1                                                                                                        | 6-1                                                                                                | 6-2                                            | 7-1                                                                |
|-------------------------------------------------------|--------------------------------------------------------------|-------------------------------------------------------------------------------|---------------------------------|----------------------------------------------------------------------------------|-------------------------------|------------------------------------------------------------------------------------------------------------|----------------------------------------------------------------------------------------------------|------------------------------------------------|--------------------------------------------------------------------|
| Family ID                                             | F1                                                           | F2                                                                            | F2                              | F3                                                                               | F4                            | F5                                                                                                         | F6                                                                                                 | F6                                             | F7                                                                 |
| <b>Birth history</b>                                  |                                                              |                                                                               |                                 |                                                                                  |                               |                                                                                                            |                                                                                                    |                                                |                                                                    |
| Pregnancy, birth                                      | CS at week 38 due to fetal distress                          | Normal                                                                        | Normal                          | Normal/CS                                                                        | Normal                        | Normal/CS                                                                                                  | CS week 33+6 premature labour                                                                      | PROM week 32, induced delivery week 37         | Born at term                                                       |
| Birth weight (SD)                                     | 2.8 kg (-1.8 SD)                                             | 2 kg (SD NA)                                                                  | 2.8 kg (SD NA)                  | 3 kg (-0.8 SD)                                                                   | 3.1 kg (-0.03 SD)             | 2.8 kg (-1.2 SD)                                                                                           | 2.6 kg (0.65 SD)                                                                                   | 3.2 kg (0.77 SD)                               | 2.7 kg (-1.71 SD)                                                  |
| Birth length (SD)                                     | 45 cm (-2.7 SD)                                              | NA                                                                            | NA                              | 47 cm (-1.1 SD)                                                                  | NA                            | 49 cm (-0.2 SD)                                                                                            | 44 cm (-1.05 SD)                                                                                   | 47 cm (-0.49 SD)                               | Not available                                                      |
| Birth OFC (SD)                                        | 32 cm (-2.6 SD)                                              | NA                                                                            | NA                              | 33.5 cm (-0.8 SD)                                                                | NA                            | 33 cm (-1.2 SD)                                                                                            | 31 cm (-0.65 SD)                                                                                   | 34 cm (0.66 SD)                                | Not available                                                      |
| Hypotonia at birth/childhood                          | Yes                                                          | NA                                                                            | NA                              | Yes                                                                              | Yes                           | Yes                                                                                                        | Yes                                                                                                | No                                             | Yes                                                                |
| <b>Growth</b>                                         |                                                              |                                                                               |                                 |                                                                                  |                               |                                                                                                            |                                                                                                    |                                                |                                                                    |
| Feeding difficulties                                  | Yes                                                          | NA                                                                            | NA                              | No                                                                               | Yes                           | No                                                                                                         | No                                                                                                 | No                                             | Yes                                                                |
| Growth failure                                        | Yes                                                          | NA                                                                            | NA                              | Yes (mild)                                                                       | No                            | No                                                                                                         | No                                                                                                 | No                                             | Not available                                                      |
| Weight (SD)                                           | 78 kg (2.03 SD)                                              | NA                                                                            | NA                              | 13.5 kg (-1.4 SD)                                                                | 69 kg (+1.06 SD)              | 13 kg (-0.04 SD)                                                                                           | 12y: 43.5 kg (-0.15 SD)                                                                            | 9y: 46 kg (1.88 SD)                            | NA                                                                 |
| Length (SD)                                           | 151.5 cm (-2.6 SD)                                           | NA                                                                            | NA                              | 92 cm (-1.7 SD)                                                                  | 1.73 m (+0.99 SD)             | 98 cm (+1.7 SD)                                                                                            | 12y: 156.3 cm (-0.01 SD)                                                                           | 9y: 135.5 cm (-0.01 SD)                        | 170cm (+1.03 SD)                                                   |
| OFC (SD)                                              | 53 cm (-1.35 SD)                                             | NA                                                                            | NA                              | 42.8 cm (-4.2 SD)                                                                | 55.5 cm (+0.39 SD)            | 43.5 cm (-2.7 SD)                                                                                          | 12y: 51.6 cm (-1.94 SD)                                                                            | 9y: 50.5 cm (-1.51 SD)                         | 51 cm (-3.26 SD)                                                   |
| <b>Psychomotor development and cognitive function</b> |                                                              |                                                                               |                                 |                                                                                  |                               |                                                                                                            |                                                                                                    |                                                |                                                                    |
| Developmental Delay                                   | Global                                                       | Global                                                                        | Global                          | Motor                                                                            | Global, mild                  | Global                                                                                                     | Mild DD                                                                                            | Mild DD                                        | Global                                                             |
| Intellectual disability                               | Severe                                                       | Severe                                                                        | Severe                          | No, average cognition                                                            | Mild                          | Mild                                                                                                       | Mild                                                                                               | Learning difficulties                          | Mild learning disability                                           |
| <b>Neurological</b>                                   |                                                              |                                                                               |                                 |                                                                                  |                               |                                                                                                            |                                                                                                    |                                                |                                                                    |
| Microcephaly (OFC)                                    | No (-1.35 SD)                                                | Yes (NA)                                                                      | Yes (NA)                        | Yes (-4.2 SD)                                                                    | No                            | Yes (-3 SD)                                                                                                | Yes                                                                                                | No                                             | Yes                                                                |
| Posture                                               | Left sided spastic cerebral palsy                            | Decerebrate                                                                   | NA                              | Could sit and walk with support. Tendon release at 3 y old.                      | NA                            | Could sit and stand supported. Hypertonia of lower limbs.                                                  | Right sided spastic cerebral palsy                                                                 | Bilateral spastic cerebral palsy               | Generally normal. Mother reports tendency to slump.                |
| Balance                                               | NA                                                           | NA                                                                            | NA                              | Mildly defective                                                                 | NA                            | Defective                                                                                                  | NA                                                                                                 | Reduced                                        | NA                                                                 |
| Spasticity                                            | Yes (unilateral)                                             | Yes (severe)                                                                  | Yes                             | Yes, mainly in lower limbs                                                       | No                            | Yes, mainly in lower limbs                                                                                 | Yes (unilateral)                                                                                   | Yes (lower limbs)                              | No                                                                 |
| Hyperreflexia                                         | NA                                                           | Yes (severe, with clonus)                                                     | Yes (severe, occasional clonus) | Yes in lower limbs                                                               | NA                            | Yes in lower limbs                                                                                         | Yes (unilateral)                                                                                   | Yes (lower limbs)                              | No                                                                 |
| Movement disorders                                    | No                                                           | No                                                                            | Drooling                        | No                                                                               | No                            | No                                                                                                         | No                                                                                                 | No                                             | No                                                                 |
| Abnormal behavior                                     | Anxiety                                                      | None reported                                                                 | None reported                   | Anxiety/fear (related to intensive physiotherapy and tendon release)             | Mild                          | No                                                                                                         | ADHD, anxiety                                                                                      | None reported                                  | Autism spectrum disorder associated with anxiety and mood lability |
| Sleep disorders/Apnea                                 | NA                                                           | Poor sleep                                                                    | No                              | No                                                                               | No                            | No                                                                                                         | Yes                                                                                                | No                                             | No                                                                 |
| Additional features                                   | Episodes of psychosis                                        | None                                                                          | Drooling                        | Could use the hands well                                                         | Asymmetric lower extremities  | Drooling, could use the hands but limited fine movement                                                    | Urine incontinence, hypercalcaemia                                                                 | Urine incontinence, constipation               | Episodes of psychosis                                              |
| <b>Epilepsy</b>                                       |                                                              |                                                                               |                                 |                                                                                  |                               |                                                                                                            |                                                                                                    |                                                |                                                                    |
| Seizures                                              | Yes                                                          | Yes                                                                           | No                              | No                                                                               | Yes (once)                    | No                                                                                                         | Yes                                                                                                | No                                             | No                                                                 |
| Age at onset                                          | 6 weeks                                                      | 15 months                                                                     | -                               | -                                                                                | 2 y                           | -                                                                                                          | 13 y                                                                                               | -                                              | -                                                                  |
| Seizure type                                          | GTCS (single episode)                                        | GTCS                                                                          | -                               | -                                                                                | unknown                       | -                                                                                                          | GTCS                                                                                               | -                                              | -                                                                  |
| EEG                                                   | NA                                                           | Multifocal interictal epileptic discharges, predominant over right hemisphere | NA                              | Normal                                                                           | NA                            | Normal                                                                                                     | EEG: Normal. Sleep deprived EEG: Suspicious, not certain epileptic                                 | NA                                             | NA                                                                 |
| Seizure response to antiepileptic drugs               | Yes                                                          | NA                                                                            | -                               | -                                                                                | NA                            | -                                                                                                          | NA                                                                                                 | -                                              | NA                                                                 |
| Status epilepticus                                    | Yes                                                          | NA                                                                            | -                               | -                                                                                | No                            | -                                                                                                          | No                                                                                                 | -                                              | No                                                                 |
| <b>Musculoskeletal</b>                                |                                                              |                                                                               |                                 |                                                                                  |                               |                                                                                                            |                                                                                                    |                                                |                                                                    |
| Fatigability                                          | Yes (with cramping)                                          | NA                                                                            | NA                              | Yes                                                                              | Yes                           | Yes                                                                                                        | Yes                                                                                                | Yes                                            | Yes                                                                |
| Strength                                              | NA                                                           | NA                                                                            | NA                              | Mild hip girdle weakness                                                         | NA                            | Girdle and lower limb weakness                                                                             | NA                                                                                                 | NA                                             | Non-compliant with examination                                     |
| Contractures                                          | Achilles contractures                                        | No                                                                            | No                              | Tip toeing and tense adductors, requiring tendon release                         | Tendon release (age 6 months) | No                                                                                                         | Achilles tendon - Botox and operation                                                              | Achilles tendon, Botox and operation.          | No                                                                 |
| Other myopathic features                              | Several episodes of rhabdomyolysis, red ragged muscle fibers | None                                                                          | None                            | No                                                                               | No                            | No                                                                                                         | No                                                                                                 | No                                             | No                                                                 |
| Lordosis/Scoliosis                                    | Yes (lumbar lordosis)                                        | Yes (lordosis)                                                                | No                              | No                                                                               | Yes (lordosis and scoliosis)  | Mild kyphosis on sitting                                                                                   | No                                                                                                 | Yes (lordosis)                                 | No                                                                 |
| Skeletal defects                                      | No                                                           | None                                                                          | None                            | No                                                                               | Hip dysplasia at birth        | Genu recurvatum                                                                                            | No                                                                                                 | No                                             | Slim, long-limbed habitus                                          |
| EMG                                                   | Normal                                                       | NA                                                                            | NA                              | Normal                                                                           | NA                            | Normal                                                                                                     | NA                                                                                                 | NA                                             | NA                                                                 |
| <b>Dysmorphism</b>                                    |                                                              |                                                                               |                                 |                                                                                  |                               |                                                                                                            |                                                                                                    |                                                |                                                                    |
| Facies                                                | Hypotelorism, Broad nasal tip, large upper incisors          | Normal                                                                        | Normal                          | Normal                                                                           | Normal                        | High bossing forehead, sparse thin hair, epicanthic folds, prominent nose, retruded mandible, low set ears | Synophrys, antverted nostrils, thin upper lip and small chin. Epidermal scar-like nevus left cheek | Antverted nostrils, thin upper lip, small chin | Normal                                                             |
| <b>Cardiovascular</b>                                 |                                                              |                                                                               |                                 |                                                                                  |                               |                                                                                                            |                                                                                                    |                                                |                                                                    |
| Blood pressure                                        | NA                                                           | Normal                                                                        | Normal                          | Normal                                                                           | Normal                        | Normal                                                                                                     | Normal                                                                                             | Normal                                         | NA                                                                 |
| Cardiac abnormalities                                 | No                                                           | None reported                                                                 | None reported                   | None reported                                                                    | None reported                 | None reported                                                                                              | None reported                                                                                      | None reported                                  | Closure of patent ductus arteriosus at age 6 months.               |
| <b>Sensory</b>                                        |                                                              |                                                                               |                                 |                                                                                  |                               |                                                                                                            |                                                                                                    |                                                |                                                                    |
| Vision, eyes                                          | Normal                                                       | Bilateral optic disc pallor, poor vision                                      | Bilateral optic disc pallor     | Nystagmus (at 5m)                                                                | Normal                        | Normal                                                                                                     | Srabisms, hypermetropia, astigmatism                                                               | Hypermetropia                                  | Mild foveal retinal pigment epithelium changes                     |
| Hearing                                               | Normal                                                       | Normal                                                                        | Normal                          | Normal (ABR normal)                                                              | Normal                        | Normal (ABR normal)                                                                                        | NA                                                                                                 | NA                                             | Normal                                                             |
| <b>Additional features</b>                            |                                                              |                                                                               |                                 |                                                                                  |                               |                                                                                                            |                                                                                                    |                                                |                                                                    |
| Skin                                                  | Normal                                                       | Normal                                                                        | Normal                          | Normal                                                                           | Cutis marmorata               | Large pigmented area in right buttock                                                                      | Scar-like epidermal nevus left cheek                                                               | Normal                                         | Dry skin/dermatitis affecting hands                                |
| Other                                                 | None reported                                                | None reported                                                                 | None reported                   | Tendon release operation                                                         | Mild hirsutism lower legs     | None reported                                                                                              | None reported                                                                                      | None reported                                  | Acquired hypothyroidism onset age 13 years                         |
| <b>Neuroimaging</b>                                   |                                                              |                                                                               |                                 |                                                                                  |                               |                                                                                                            |                                                                                                    |                                                |                                                                    |
| White matter signal alterations                       | Yes, periventricular                                         | No                                                                            | No                              | Yes, periventricular                                                             | Normal MRI at age 13          | Yes, periventricular                                                                                       | Yes, periventricular                                                                               | Yes, periventricular                           | NA                                                                 |
| Corpus callosum hypoplasia/agenesis                   | Yes, hypoplasia                                              | Yes, partial agenesis                                                         | Yes, partial agenesis           | Yes, hypoplasia                                                                  | No                            | Yes, hypoplasia                                                                                            | Slightly slender                                                                                   | No                                             | NA                                                                 |
| Abnormal cortical gyration                            | No                                                           | Yes, bilateral PMG                                                            | No                              | No                                                                               | No                            | No                                                                                                         | No                                                                                                 | No                                             | NA                                                                 |
| Other findings                                        | None                                                         | None                                                                          | None                            | Small calcifications in the periventricular white matter and right basal ganglia | No                            | None                                                                                                       | Bilateral grey matter calcifications                                                               | No                                             | NA                                                                 |

Key  
 CS = C-section  
 PROM = premature rupture of membranes  
 OFC = occipital frontal circumference  
 GTCS = generalized tonic clonic seizure  
 NA = not assessed

Supplementary Table 2: Known clinical information for heterozygous relatives of affected individuals

| Initial Report                     | This Study            | This Study                                               | This Study                                                                                                                                          | This Study                                                               | This Study                                   | This Study                                                                    | This Study                               | This Study                                       |
|------------------------------------|-----------------------|----------------------------------------------------------|-----------------------------------------------------------------------------------------------------------------------------------------------------|--------------------------------------------------------------------------|----------------------------------------------|-------------------------------------------------------------------------------|------------------------------------------|--------------------------------------------------|
| Patient ID                         | Mother of 1-1         | Father of 1-1                                            | Maternal aunt of 1-1                                                                                                                                | Mother of 2-1 and 2-2                                                    | Father of 2-1 and 2-2                        | Mother of 3-1                                                                 | Father of 3-1                            | Mother of 5-1                                    |
| Family ID                          | F1                    | F1                                                       | F1                                                                                                                                                  | F2                                                                       | F2                                           | F3                                                                            | F3                                       | F5                                               |
| <b>Demographics</b>                |                       |                                                          |                                                                                                                                                     |                                                                          |                                              |                                                                               |                                          |                                                  |
| Year of birth or age at assessment | 1974                  | 1973                                                     | 1973                                                                                                                                                | 38 y                                                                     | 40 y                                         | NA                                                                            | NA                                       | NA                                               |
| Sex                                | F                     | M                                                        | F                                                                                                                                                   | F                                                                        | M                                            | F                                                                             | M                                        | F                                                |
| Nationality                        | Norwegian             | Norwegian                                                | Norwegian                                                                                                                                           | Pakistani                                                                | Pakistani                                    | Egyptian                                                                      | Egyptian                                 | Egyptian                                         |
| <b>Genetics</b>                    |                       |                                                          |                                                                                                                                                     |                                                                          |                                              |                                                                               |                                          |                                                  |
| gDNA (hg38)                        | chr12-21910156-C-T    | chr12-21910156-C-T                                       | chr12-21910156-C-T                                                                                                                                  | chr12-21848204-G-A                                                       | chr12-21848204-G-A                           | chr12-21809956-C-A                                                            | chr12-21809956-C-A                       | chr12-21910243-G-A                               |
| cDNA†                              | Het c.1320+1G>A       | Het c.1320+1G>A                                          | Het c.1320+1G>A                                                                                                                                     | Het c.2812C>T                                                            | Het c.2812C>T                                | Het c.4212-1G>T                                                               | Het c.4212-1G>T                          | Het c.1234C>T                                    |
| Protein                            | p.(Ala389_Gln440del)  | p.(Ala389_Gln440del)                                     | p.(Ala389_Gln440del)                                                                                                                                | p.(Arg938Ter)                                                            | p.(Arg938Ter)                                | p.(Phe1405SerfsTer8)                                                          | p.(Phe1405SerfsTer8)                     | p.(Gln412Ter)                                    |
| Clinical info                      | Healthy. No seizures. | Hodgkin lymphoma. Compartment syndrome & rhabdomyolysis. | Premature birth w 29. GTK from childhood, epileptic encephalopathy, mild ID. Has family & children. MRI focal cause of epilepsy, right frontal lobe | Healthy                                                                  | Healthy                                      | Healthy                                                                       | Healthy                                  | Healthy; reported repeated unexplained abortions |
| Hypertension                       | NA                    | NA                                                       | No                                                                                                                                                  | No                                                                       | No                                           | No                                                                            | No                                       | No                                               |
| <b>Demographics</b>                |                       |                                                          |                                                                                                                                                     |                                                                          |                                              |                                                                               |                                          |                                                  |
| Initial Report                     | This Study            | This Study                                               | This Study                                                                                                                                          | Smeland et al 2019                                                       | Smeland et al 2019                           | Smeland et al 2019                                                            | Smeland et al 2019                       | Smeland et al 2019                               |
| Patient ID                         | Father of 5-1         | Father of 6-1 and 6-2                                    | Mother of 6-1 and 6-2                                                                                                                               | Father of Family 1 in Smeland et al 2019                                 | Mother of Family 1 in Smeland et al 2019     | Aborted fetus of Family 1 in Smeland et al 2019                               | Father of Family 2 in Smeland et al 2019 | Mother of Family 2 in Smeland et al 2020         |
| Family ID                          | F5                    | F6                                                       | F6                                                                                                                                                  |                                                                          |                                              |                                                                               |                                          |                                                  |
| <b>Demographics</b>                |                       |                                                          |                                                                                                                                                     |                                                                          |                                              |                                                                               |                                          |                                                  |
| Year of birth or age at assessment | NA                    | 1982                                                     | 1988                                                                                                                                                | 1968                                                                     | 1975                                         | Not relevant                                                                  | 1961                                     | 1966                                             |
| Sex                                | M                     | M                                                        | F                                                                                                                                                   | M                                                                        | F                                            | F                                                                             | M                                        | F                                                |
| Nationality                        | Egyptian              | Norwegian                                                | Norwegian                                                                                                                                           | Norwegian                                                                | Norwegian                                    | Norwegian                                                                     | Norwegian                                | Norwegian                                        |
| <b>Genetics</b>                    |                       |                                                          |                                                                                                                                                     |                                                                          |                                              |                                                                               |                                          |                                                  |
| gDNA (hg38)                        | chr12-21910243-G-A    | chr12-21910156-C-T                                       | chr12-21910156-C-T                                                                                                                                  | chr12-21910156-C-T                                                       | chr12-21910156-C-T                           | chr12-21910156-C-T                                                            | chr12-21910156-C-T                       | chr12-21910156-C-T                               |
| cDNA†                              | Het c.1234C>T         | Het c.284+1G>A                                           | Het c.284+1G>A                                                                                                                                      | Het c.1320+1G>A                                                          | Het c.1320+1G>A                              | Het c.1320+1G>A                                                               | Het c.1320+1G>A                          | Het c.1320+1G>A                                  |
| Protein                            | p.(Gln412Ter)         | p.(Phe49GlyfsTer13)                                      | p.(Phe49GlyfsTer13)                                                                                                                                 | p.(Ala389_Gln440del)                                                     | p.(Ala389_Gln440del)                         | p.(Ala389_Gln440del)                                                          | p.(Ala389_Gln440del)                     | p.(Ala389_Gln440del)                             |
| Clinical info                      | Healthy               | Healthy                                                  | Healthy                                                                                                                                             | Morbus Bechterew. Ulcerous colitis. Normal cardiac evaluation at age 51. | Healthy. Normal cardiac evaluation at age 46 | "Thanatophoric dysplasia" found in pregnancy - terminated. No FGFR3 mutation. | Dilated cardiomyopathy from age 60       | Normal cardiac evaluation at age 51              |
| Hypertension                       | No                    | NA                                                       | NA                                                                                                                                                  | No                                                                       | No                                           | Not relevant                                                                  | Yes                                      | No                                               |

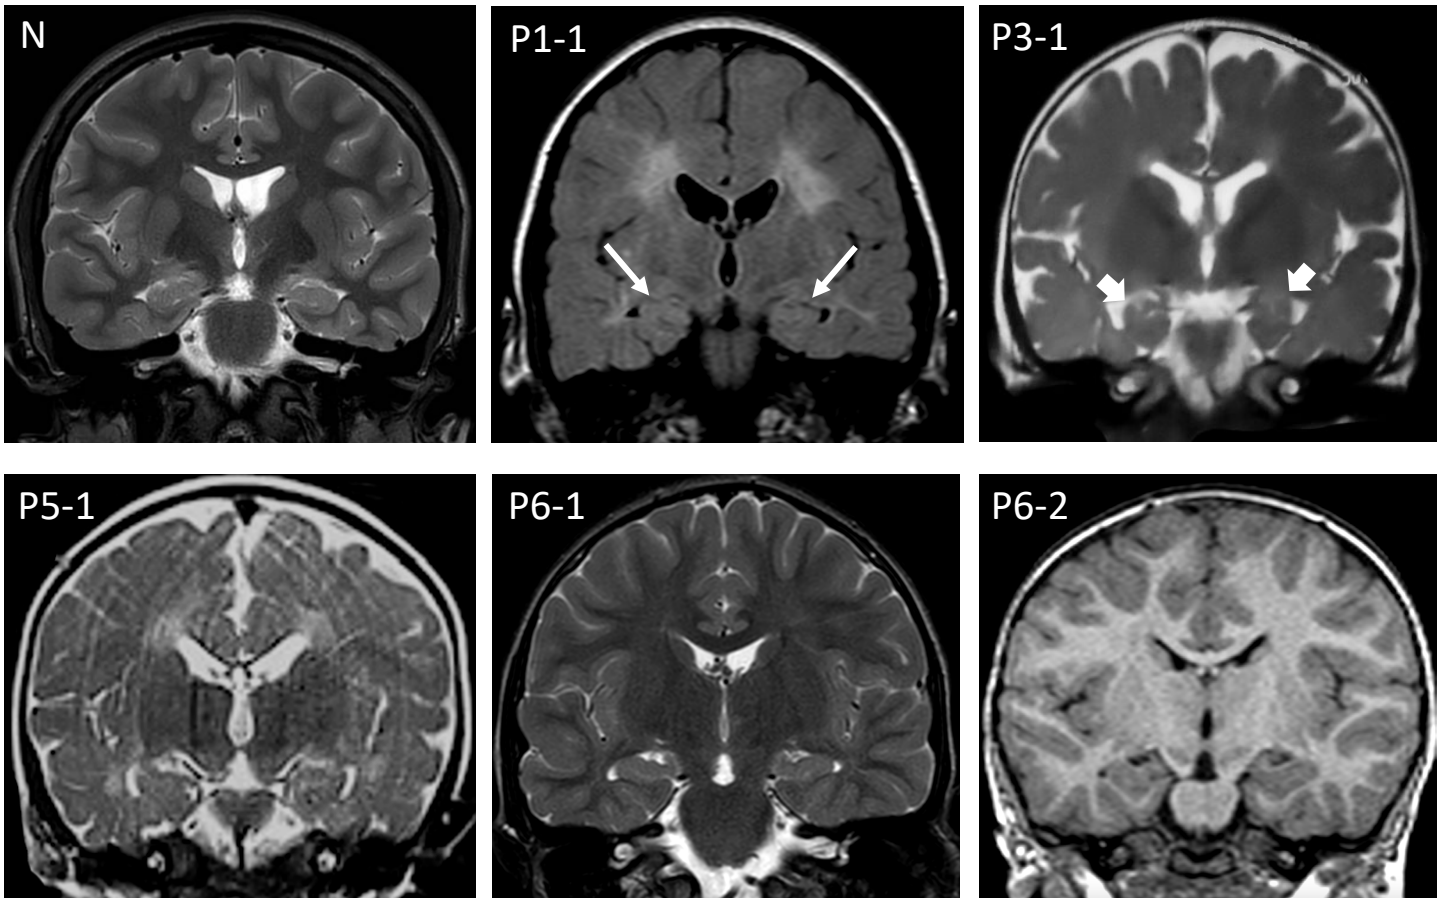

### Supplementary Figure 1

Hippocampal features in subjects with AIMS and a normal control for comparison. Brain MRI with coronal T2-weighted, FLAIR or T1-weighted images demonstrate slightly smaller volume of the hippocampi in subject P1-1 (thin arrows) and incomplete hippocampal rotation in subject P3-1 (thick arrows). No signs of hippocampal sclerosis are present.

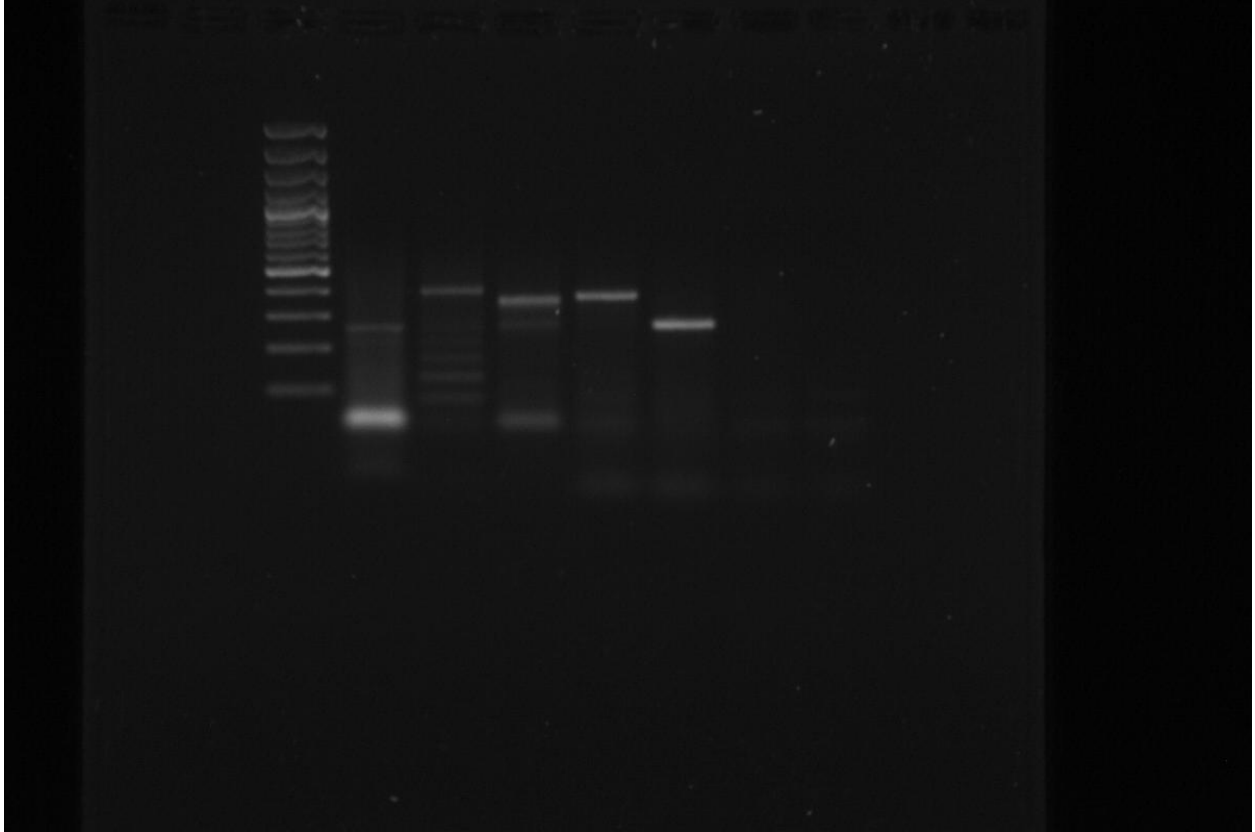

Uncut gel image from Figure 2A
